# Supplementary material
Source: Springer Nature journal article supplement (https://www.springermedizin.de/resource/supplementary/12878_2012_4_MOESM1_ESM.pdf/9686338)

Women (n=115)

■ Spontaneous

■ Probed

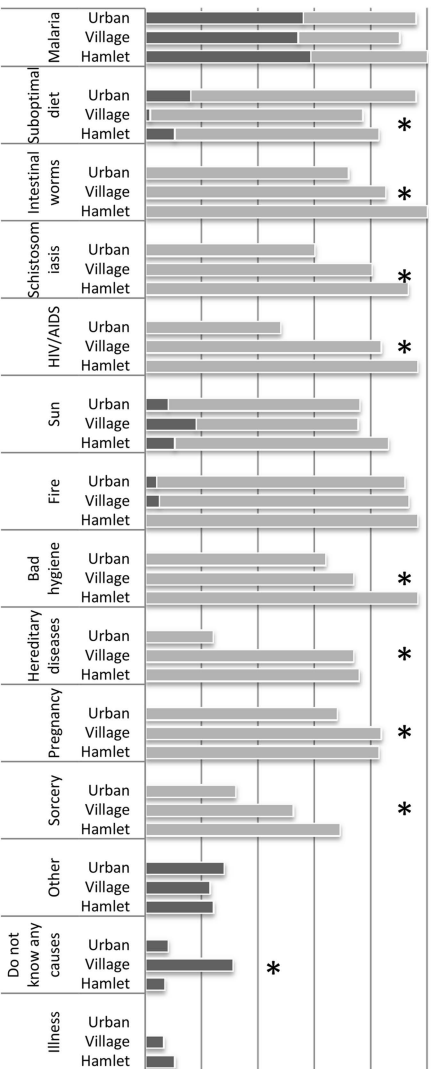

Frequency (%)

Children (n=200)

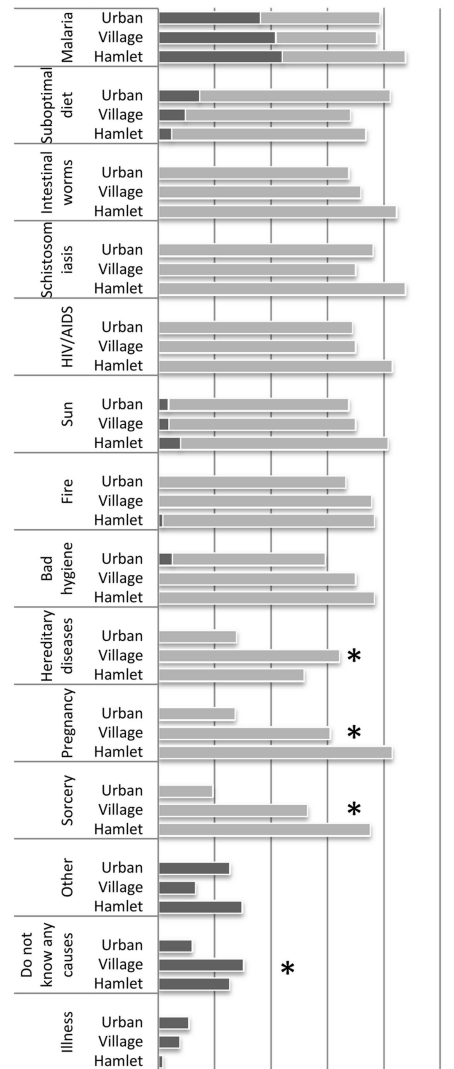

Frequency (%)

Supplement: MOESM1 [file 9686338]
